# Supplementary material
Source: PubMed Central journal article supplement (PMC5033674)

Supplementary Figure Legends:

Sup Fig. 1: **Lineage tracing demonstrates that HCA originates from AAV-Cre-marked hepatocytes when carcinogenesis is induced by DEN and CCl<sub>4</sub> treatment.** Serial sections of a representative HCA stained for H&E, Opn, AFP, Sox9, YFP/EpCAM, Yap1, and CK19. Dotted lines indicate tumor margins. Box indicates the area of shown in the high-magnification images.

Sup Fig. 2: **Lineage tracing demonstrates that HCA originates from AAV-Cre-marked hepatocytes when carcinogenesis is induced by DEN and TCPOBOP treatment.** Serial sections of a representative HCA stained for H&E, Opn, AFP, YFP/Sox9, YFP/EpCAM, Yap1, and CK19 are shown. Dotted lines indicate the tumor margins. Box indicates the area of shown in the high-magnification images.

Sup Fig. 3: ***Foxl1*-Cre-marked HPCs are not tumor-initiating cells in the DEN/TCPOBOP hepatotoxin-induced HCA.** Serial sections of a representative HCA stained for H&E, Opn, AFP, YFP/Sox9, YFP/EpCAM, Yap1, and CK19. Dotted lines indicate tumor margins. Box indicates the area of shown in the high-magnification images.

S1

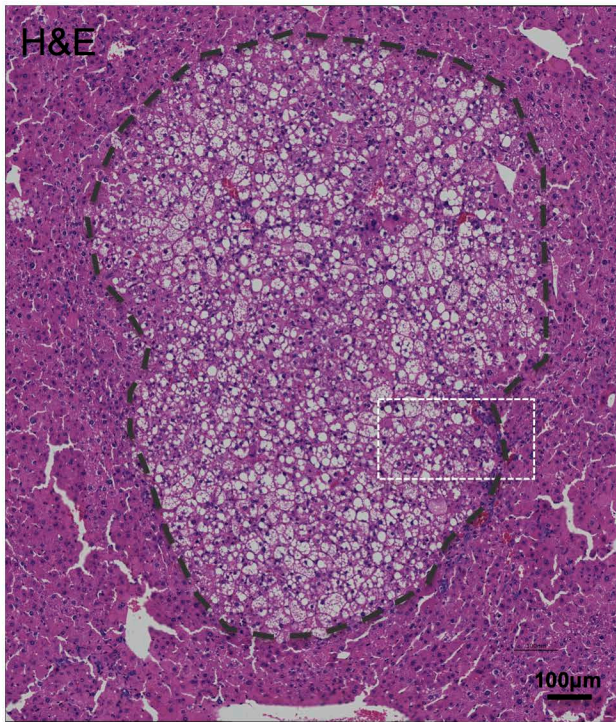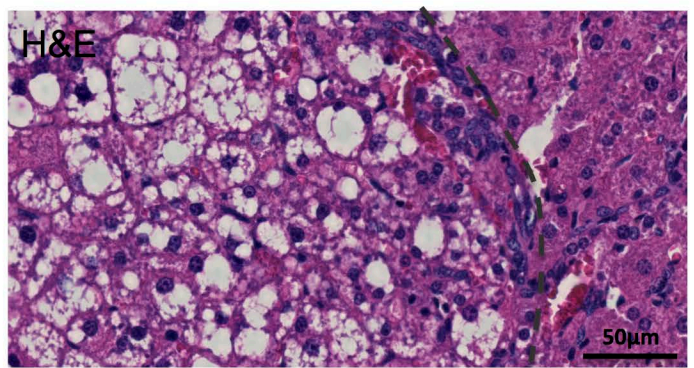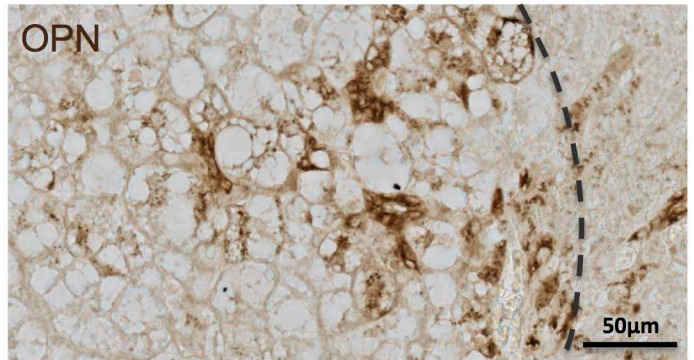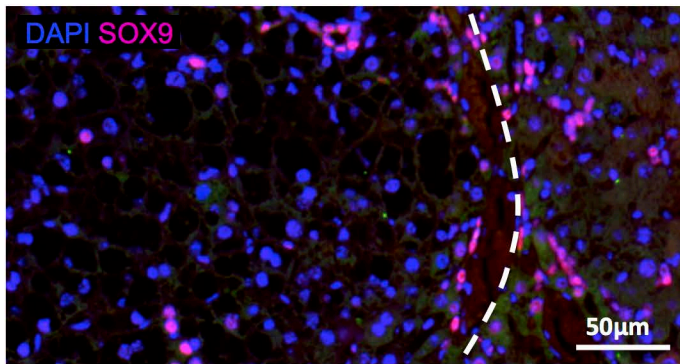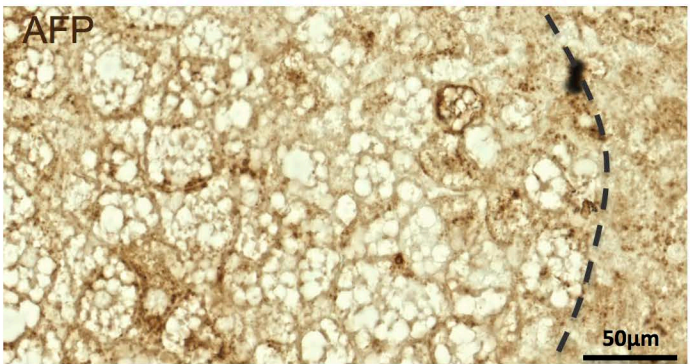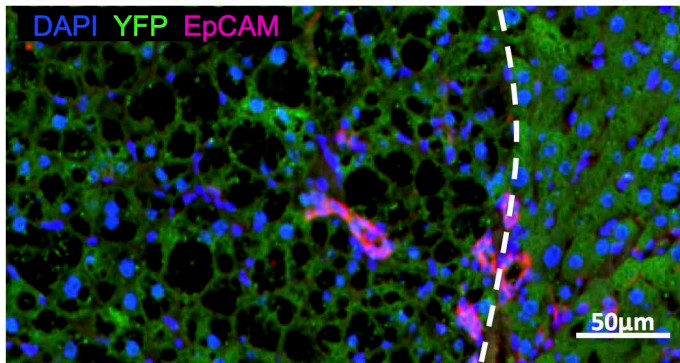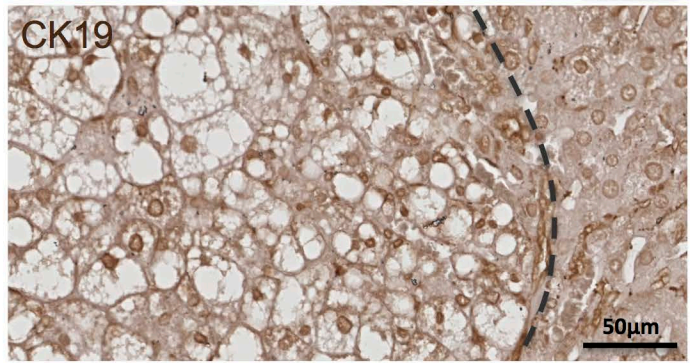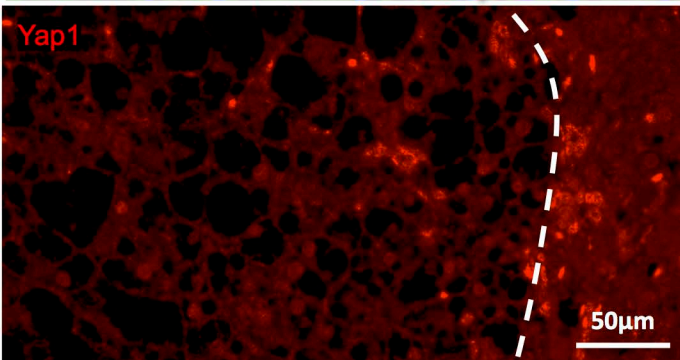

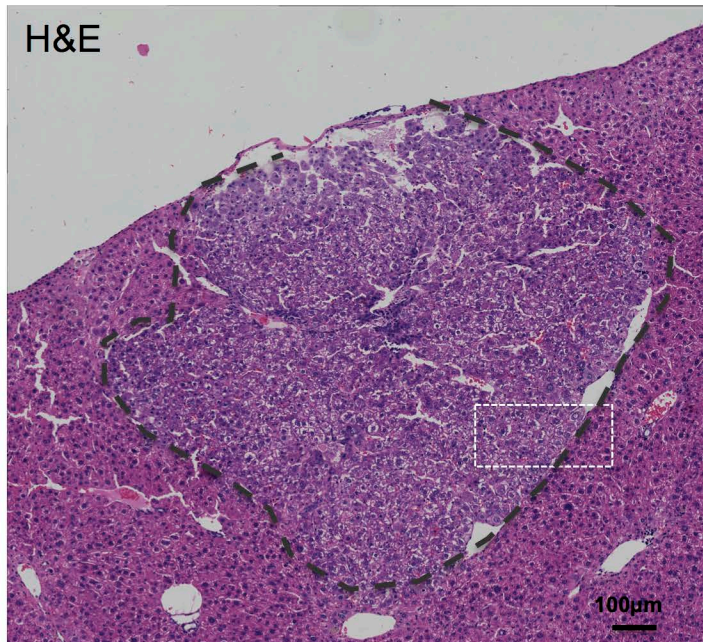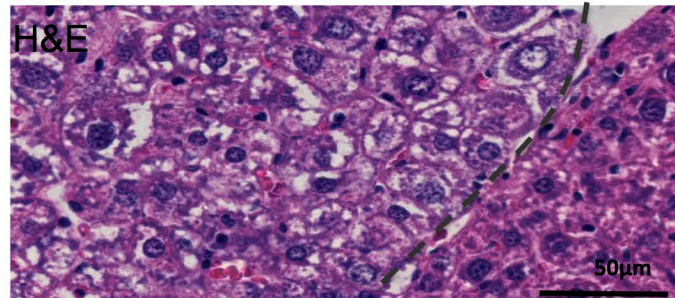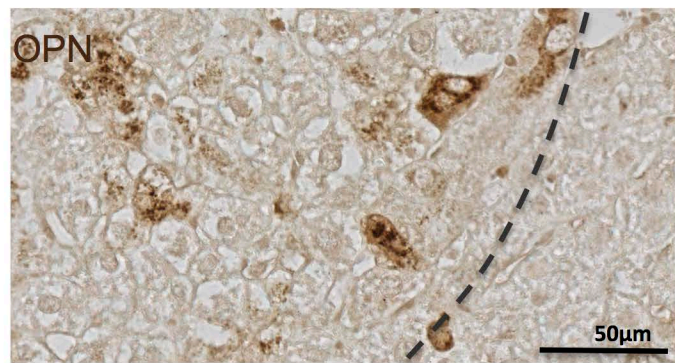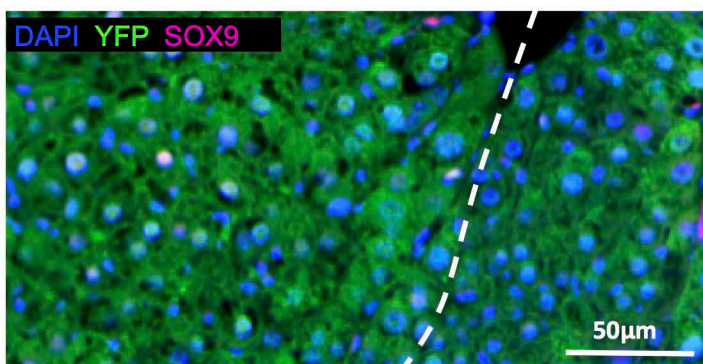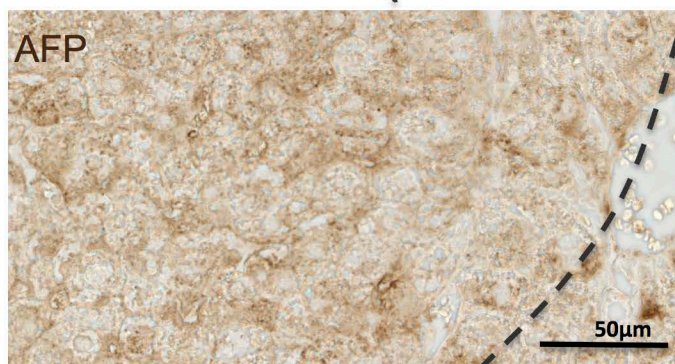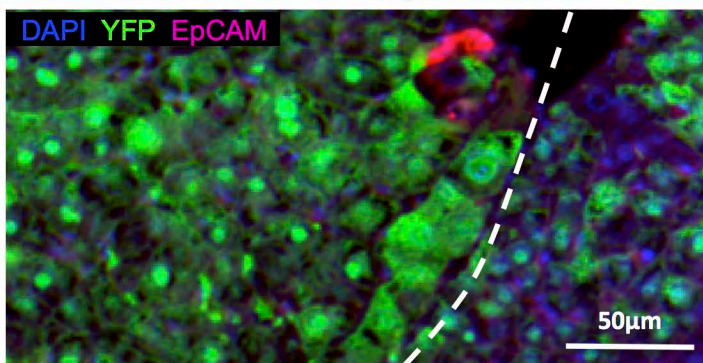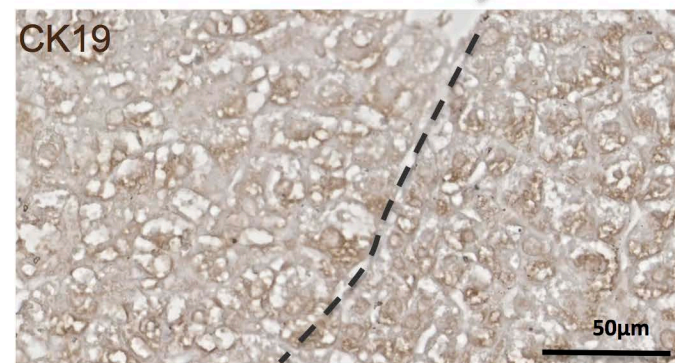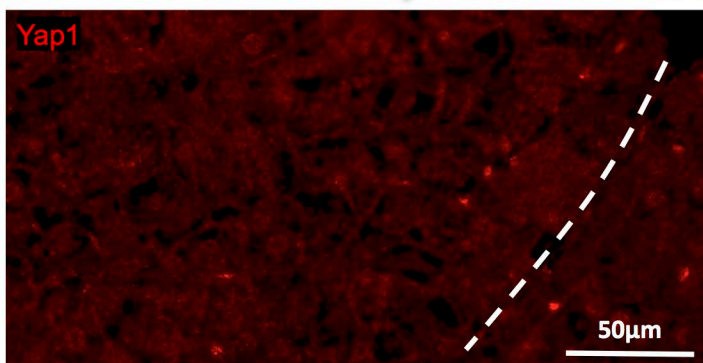

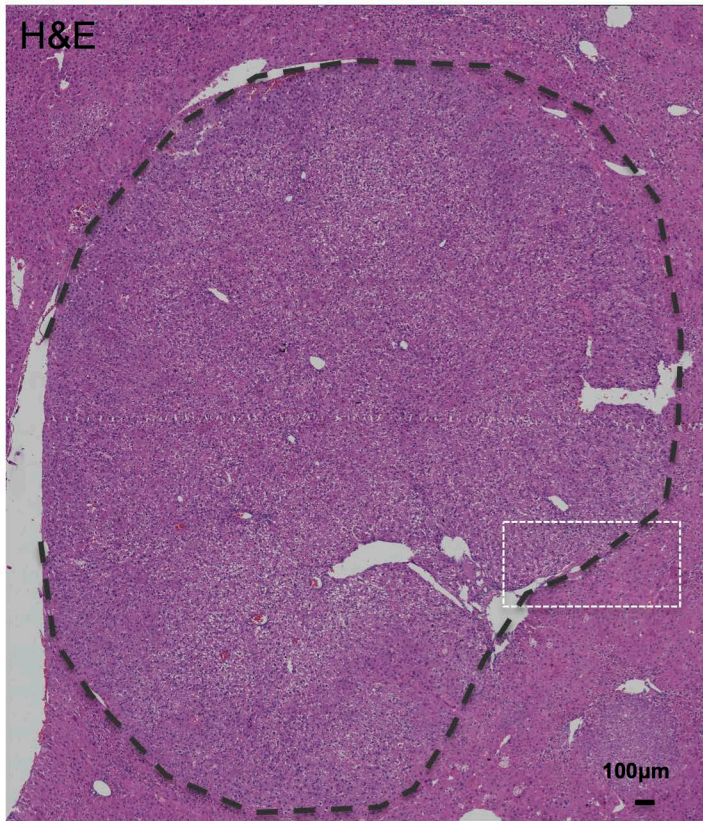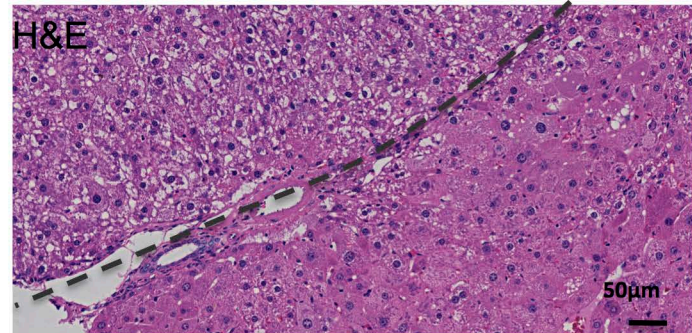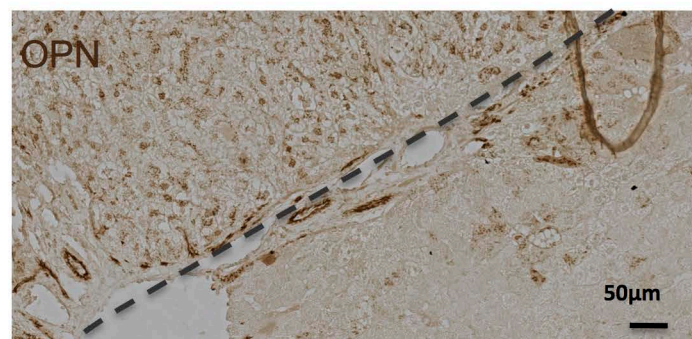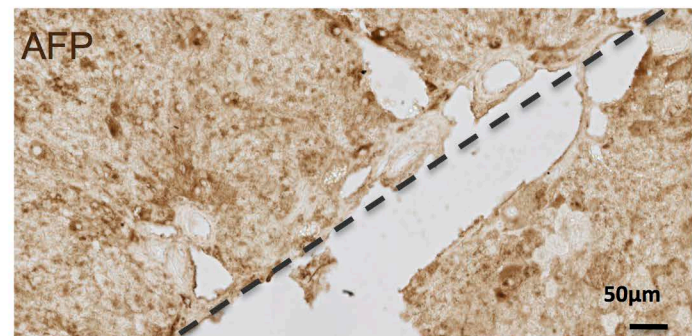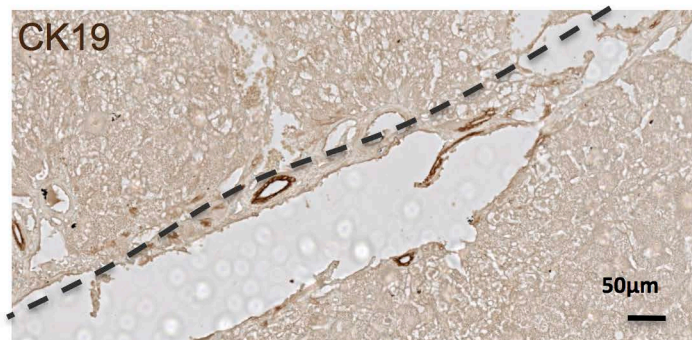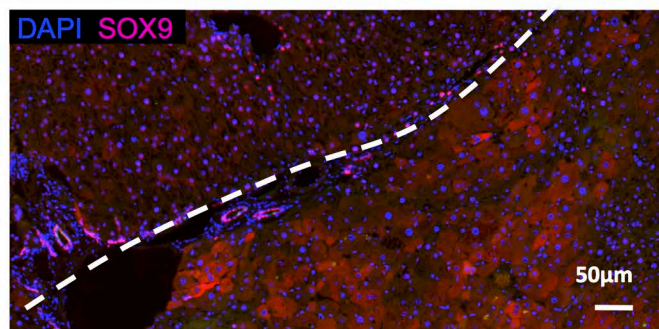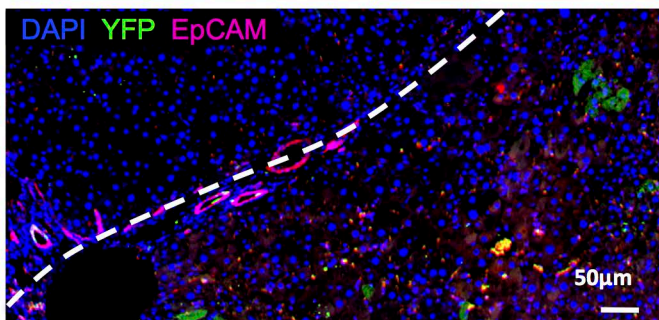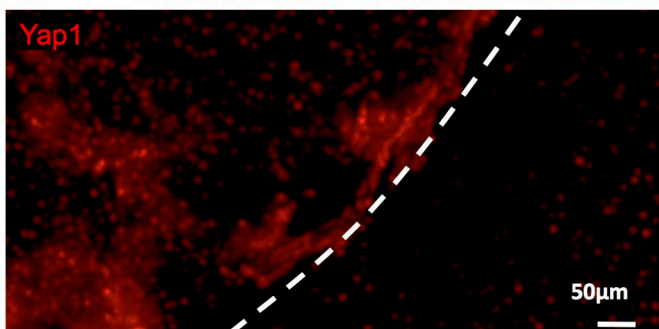

Supplement: NIHMS781242-supplement-Supp_Fig_S1.pdf [file NIHMS781242-supplement-Supp_Fig_S1.pdf]
